# Supplementary material
Source: publisher site journal article supplement (https://www.dovepress.com/article/436931)
Supplement: Supplementary file 1 [file get_supplementary_file.php]

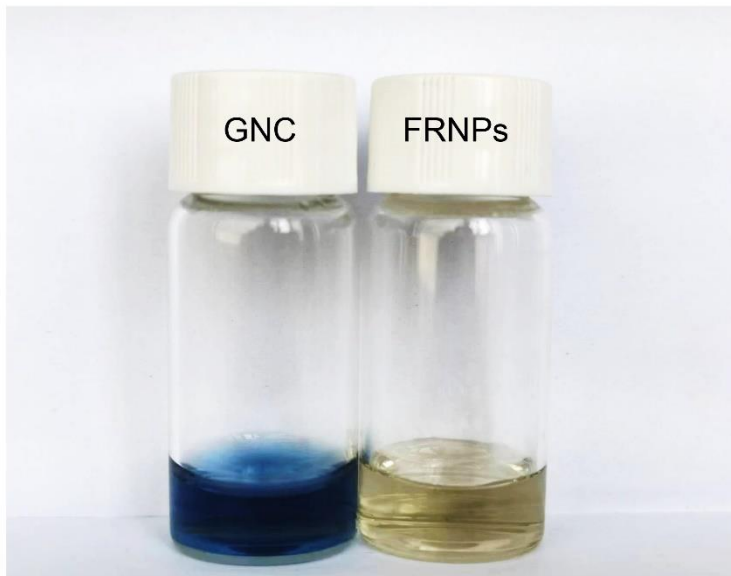

**Figure S1.** Photograph of the solutions of GNCs and resulting FRNPs, respectively.

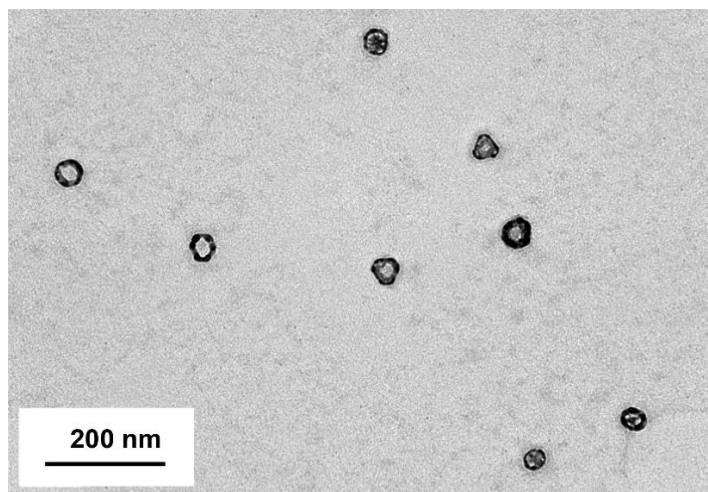

**Figure S2.** TEM image of FRNPs (scale bar = 200 nm).

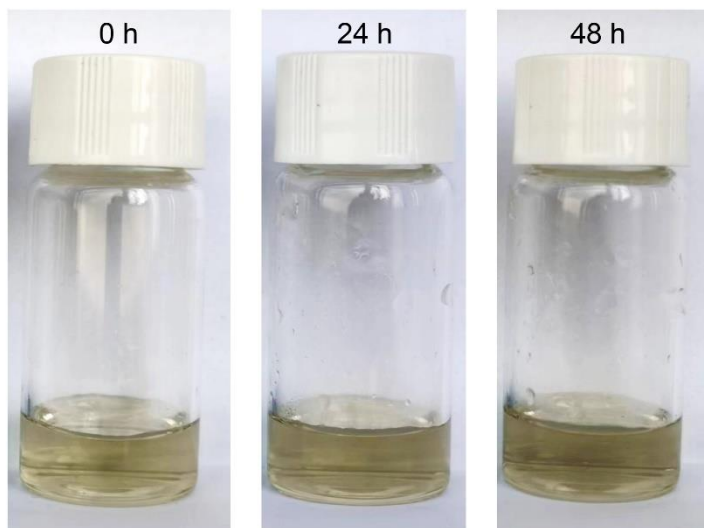

**Figure S3.** Photographs of aqueous solution of FRNPs at 0 h, 24 h, and 48 h.

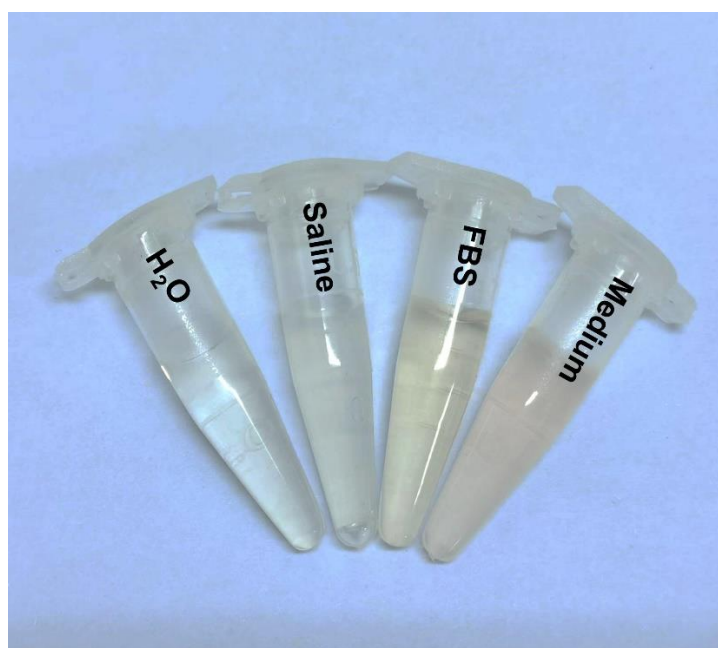

**Figure S4.** Photograph of FRNPs dispersed in water, saline, serum and cell culture medium.

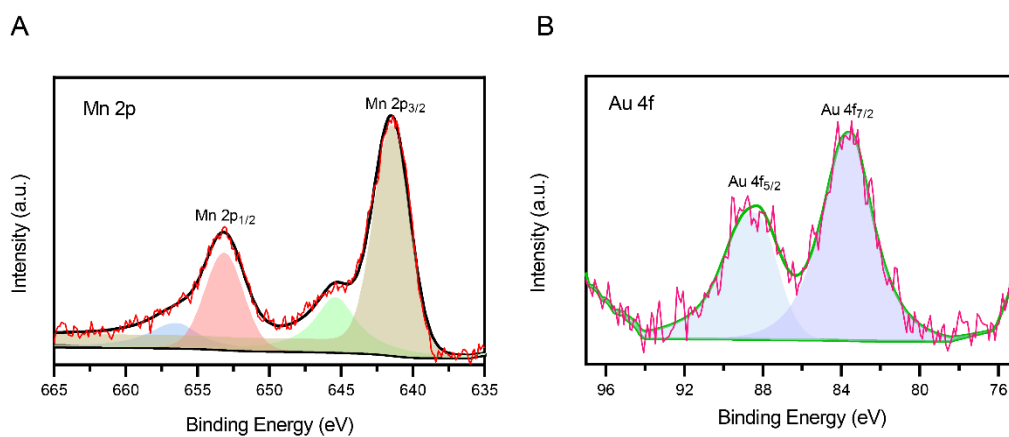

**Figure S5.** XPS spectrum of Mn 2p (A) and Au 4f (B) for FRNPs.

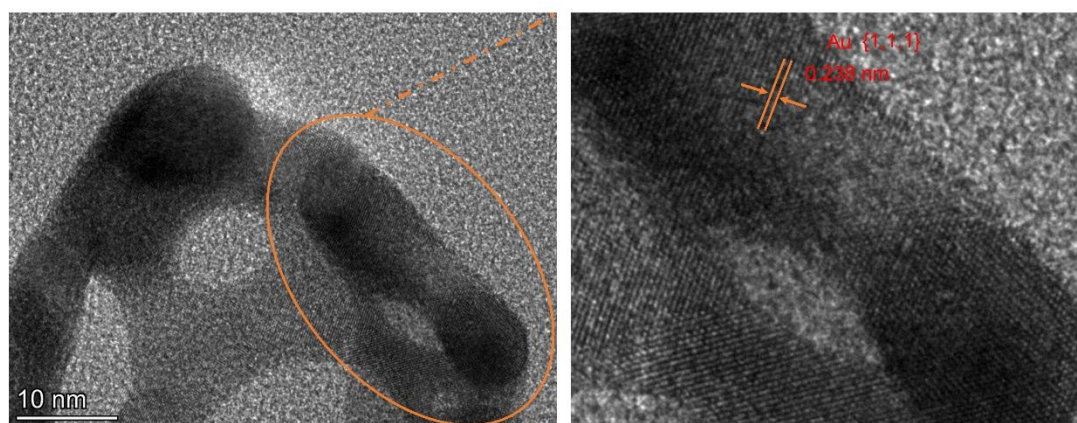

**Figure S6.** Lattice of Au in the cage structure.

| Time (h) | Hydrodynamic size (nm) |
|----------|------------------------|
| 0        | 145.37 ± 4.47          |
| 24       | 146.23 ± 3.62          |
| 48       | 148.14 ± 5.76          |

**Figure S7.** Dynamic light scattering (DLS) analysis of FRNPs at different time point.

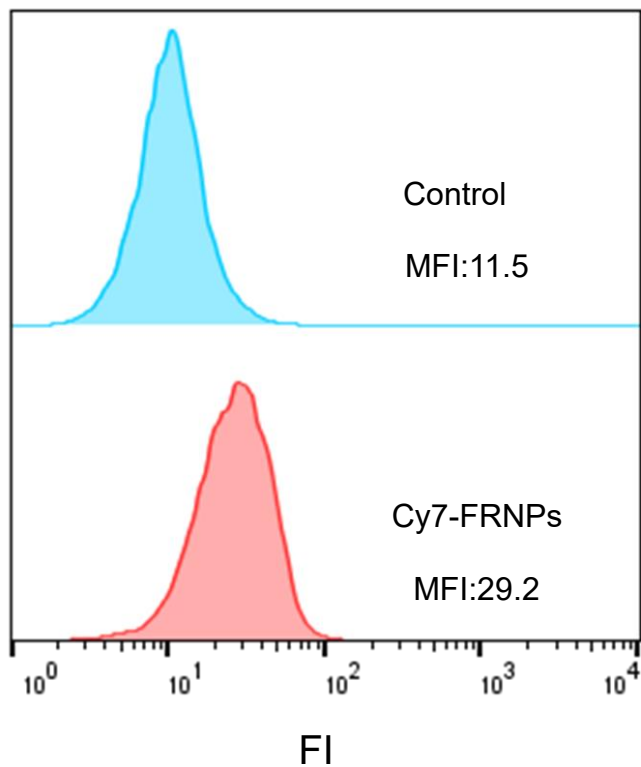

**Figure S8.** Flow cytometric analysis of the mean fluorescence intensity for ECA 109 cells incubated with PBS or Cy7-FRNPs (100  $\mu\text{g}/\text{mL}$ ) for 24 h.

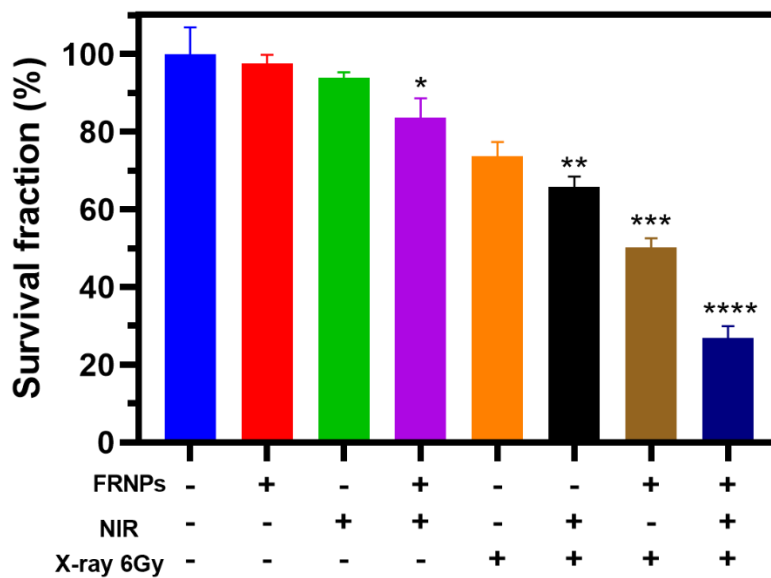

**Figure S9.** FRNPs in combined NIR photothermal and X-ray radiation exposure decreased ECA 109 cell survival rate detected by colony formation assay. Data represented were mean  $\pm$  SD of three identical experiments made in three replicates. Error bars were based on standard

deviation of three parallel samples. P-values were calculated by the student's test: \* $p < 0.05$ , \*\* $p < 0.01$ , \*\*\* $p < 0.001$ , \*\*\*\* $p < 0.0001$  compared to the control group.

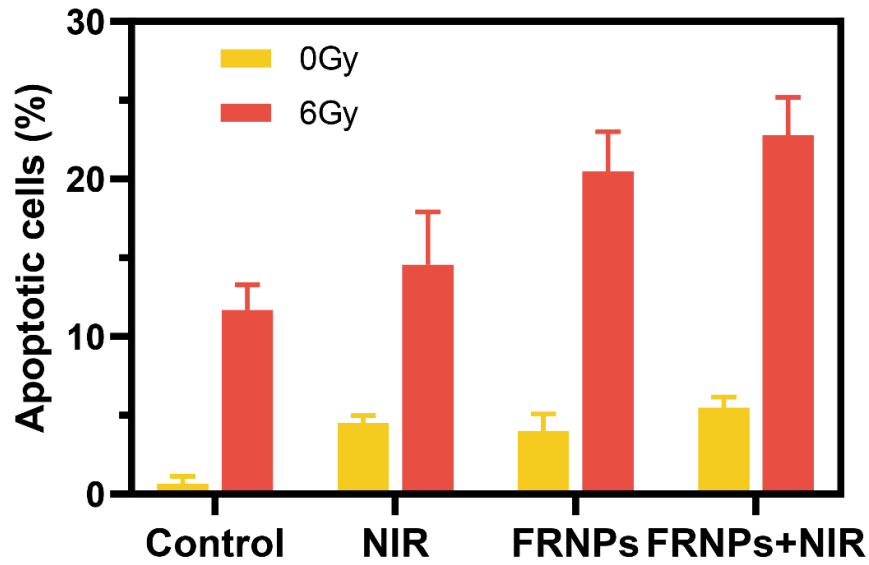

Figure S10. Quantitative analysis of cell apoptosis assay. Data are shown as mean  $\pm$  SD.

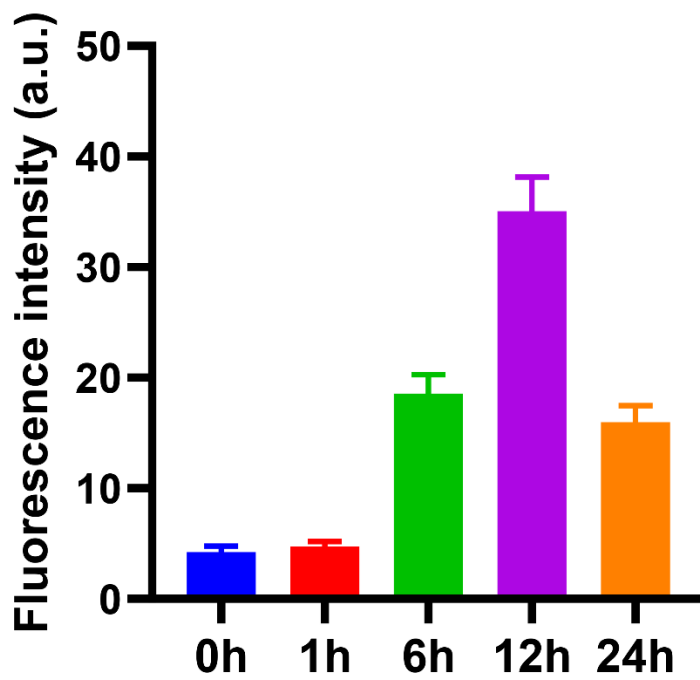

**Figure S11.** The fluorescence intensity of tumor area at different time intervals after injection of Cy7 -FRNPs.

**Table S1.** Summary of longitudinal relaxation rate of T1 contrast agent used in clinic or biomedicine.

| T1 contrast agent                                                  | Commercial name | $r_1$ (mM <sup>-1</sup> s <sup>-1</sup> ) | Ref  |
|--------------------------------------------------------------------|-----------------|-------------------------------------------|------|
| Gd-DTPA                                                            | Magnevist       | 4.32                                      | [1]  |
| Gd-DTPA-BMEA                                                       | OptiMARK        | 4.10                                      | [2]  |
| Gd-DTPA-BMA                                                        | Omniscan        | 3.80                                      | [3]  |
| Gd-DOTA                                                            | Dotarem         | 3.50                                      | [4]  |
| Gd-DO3A-Butriol                                                    | Gadavist        | 3.70                                      | [5]  |
| Gd-DO3A-HP                                                         | ProHance        | 3.60                                      | [6]  |
| Gd-BOPTA                                                           | Multihance      | 5.20                                      | [7]  |
| Gd-diphenyl-cyclohexylphosphodiester-DTPA                          | Vasovist        | 4.56                                      | [8]  |
| Fe <sub>3</sub> O <sub>4</sub> @SiO <sub>2</sub> (Gd-DTPA)-RGD NPs |                 | 4.20                                      | [9]  |
| ES-MIONs                                                           |                 | 2.40                                      | [10] |
| FRNPs                                                              |                 | 4.76                                      |      |

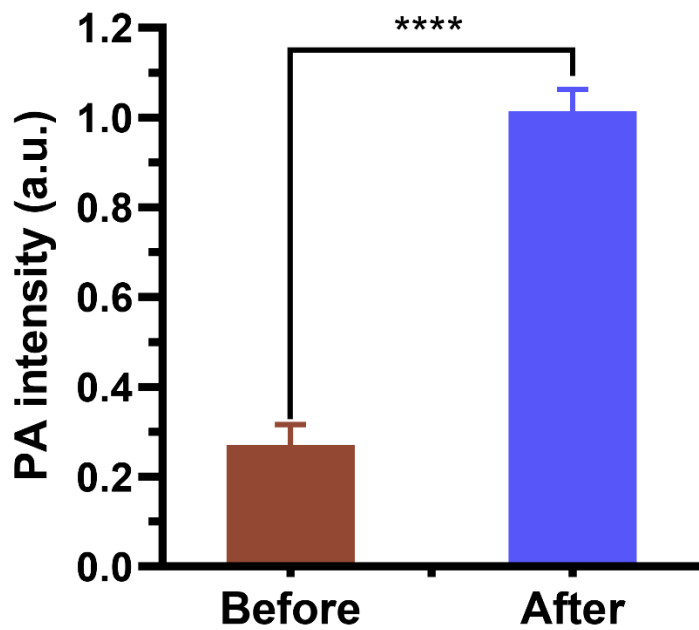

**Figure S12.** PA intensity at the tumor site before and after i.v. injection with FRNPs. P-values were calculated by the student's test: \*\*\*\*p < 0.0001.

#### References

1. Vecchione D, Aiello M, Cavaliere C, Nicolai E, Netti PA, Torino E. Hybrid core shell nanoparticles entrapping Gd-DTPA and 18F-FDG for simultaneous PET/MRI acquisitions. *Nanomedicine*. 2017;12(18):2223-2231.
2. Periasamy M, White D, deLearie L, et al. The synthesis and screening of nonionic gadolinium (III) DTPA-bisamide complexes as magnetic resonance imaging contrast agents. *Invest Radiol*. 1991;26: S217-S220.
3. Yim H, Yang S-G, Jeon YS, et al. The performance of gadolinium diethylene triamine pentaacetate-pullulan hepatocyte-specific T1 contrast agent for MRI. *Biomaterials*. 2011;32(22):5187-5194.
4. Silvio A, Lucio AP, Mauro B, et al. Synthesis, Characterization, and  $^1\text{T}$ x NMRD Profiles of Gadolinium(III) Complexes of Monoamide Derivatives of DOTA-like Ligands.



- X-ray Structure of the 10-[2-[[2-Hydroxy-1-(hydroxymethyl)ethyl]amino]-1-[(phenylmethoxy)methyl]-2-oxoethyl]-1,4,7,10-tetraazacyclododecane-1,4,7-triacetic Acid-Gadolinium(III) Complex. *Inorganic Chemistry*. 1992;31(12):2422-2428.
5. Turowski PN, Rodgers SJ, Scarrow RC, Raymond KN. Ferric Ion Sequestering Agents. 18.1 Two Dihydroxamic Acid Derivatives of EDTA and DTPA. *Inorganic Chemistry*. 1988;27(3):474-481.
  6. Dischino DD, Delaney EJD, Emswiler JEE, et al. Synthesis of Nonionic Gadolinium Chelates Useful as Contrast Agents for Magnetic Resonance Imaging. 1,4,7-Tris(carboxymethyl)-10-substituted-1,4,7,10-tetraazacyclododecanes and Their Corresponding Gadolinium Chelates. *Inorg Chem*. 1991;30:1265-1269.
  7. Peter C, Ellison JJ, McMurry TJ, Lauffer RB. Gadolinium (III) Chelates as MRI Contrast Agents: Structure, Dynamics, and Applications. *Chem Rev* 1999;99:2293–2352.
  8. Blockley NP, Jiang L, Gardener AG, Ludman CN, Francis ST, Gowland PA. Field strength dependence of R1 and R2 relaxivities of human whole blood to propanolol, vasovist, and deoxyhemoglobin. *Magnetic Resonance in Medicine*. 2008;60(6):1313-1320.
  9. Yang H, Zhuang Y, Sun Y, et al. Targeted dual-contrast T1- and T2-weighted magnetic resonance imaging of tumors using multifunctional gadolinium-labeled superparamagnetic iron oxide nanoparticles. *Biomaterials*. 2011;32(20):4584-4593.
  10. Shen Z, Chen T, Ma X, et al. Multifunctional Theranostic Nanoparticles Based on Exceedingly Small Magnetic Iron Oxide Nanoparticles for T1-Weighted Magnetic Resonance Imaging and Chemotherapy. *ACS Nano*. 2017;11(11):10992-11004.
